# Supplementary material for: Comparison of the inhibition potentials of icotinib and erlotinib against human UDP-glucuronosyltransferase 1A1
Source: PubMed Central journal article supplement — Acta Pharm Sin B. 2017 Sep 1;7(6):657–64. doi: 10.1016/j.apsb.2017.07.004 (PMC5687316; doi:10.1016/j.apsb.2017.07.004), 2017-09-01
Supplement: mmc1.pdf [file mmc1.pdf]

Short Communication

**Comparison of the inhibition potentials of icotinib and erlotinib against human UDP-glucuronosyltransferase 1A1**

Xuewei Cheng<sup>a,c,†</sup>, Xia Lv<sup>b,†</sup>, Hengyan Qu<sup>a</sup>, Dandan Li<sup>a</sup>, Mengmeng Hu<sup>a</sup>, Wenzhi Guo<sup>d</sup>, Guangbo Ge<sup>c,\*</sup>, Ruihua Dong<sup>a,\*\*</sup>

<sup>a</sup>Clinical Pharmacology Laboratory, Military Academy of Medical Science Hospital, Beijing 100071, China

<sup>b</sup>College of Life Science, Dalian Nationalities University, Dalian 116600, China

<sup>c</sup>Dalian Institute of Chemical Physics, Chinese Academy of Sciences, Dalian 116023, China

<sup>d</sup>Department of Hepatobiliary and Pancreatic Surgery, the First Affiliated Hospital of Zhengzhou University, Zhengzhou 450001, China

Received 5 April 2017; received in revised form 15 June 2017; accepted 30 June 2017

\*Corresponding author. Tel.: +86 411 843793171.

\*\* Corresponding author. Tel.: +86 10 66947482.

E-mail address: geguangbo@dicp.ac.cn (Guangbo Ge), sm.8056@163.com (Ruihua Dong).

<sup>†</sup>These authors made equal contributions to this work.

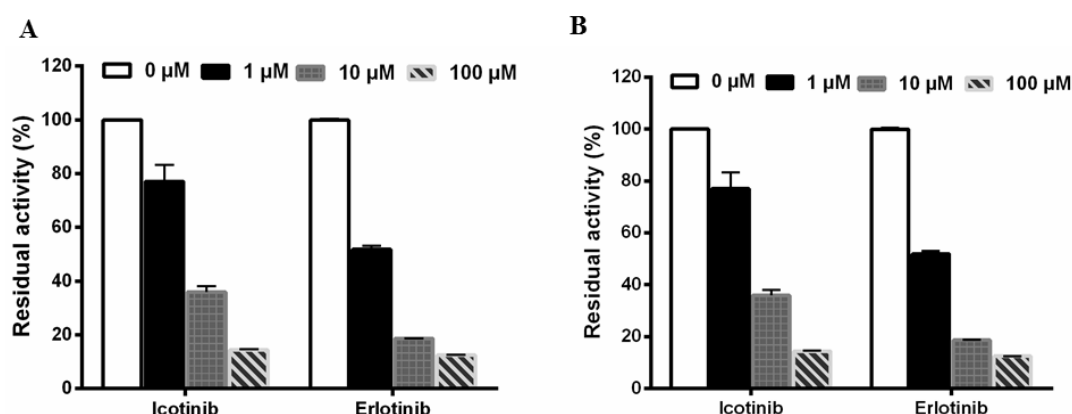

**Figure S1** Inhibitory effects of icotinib and erlotinib on the catalytic activities of NCHN-O-glucuronidation in human recombinant UGT1A1 (A) and HLMs (B). Each column represents the mean of triplicate determinations.

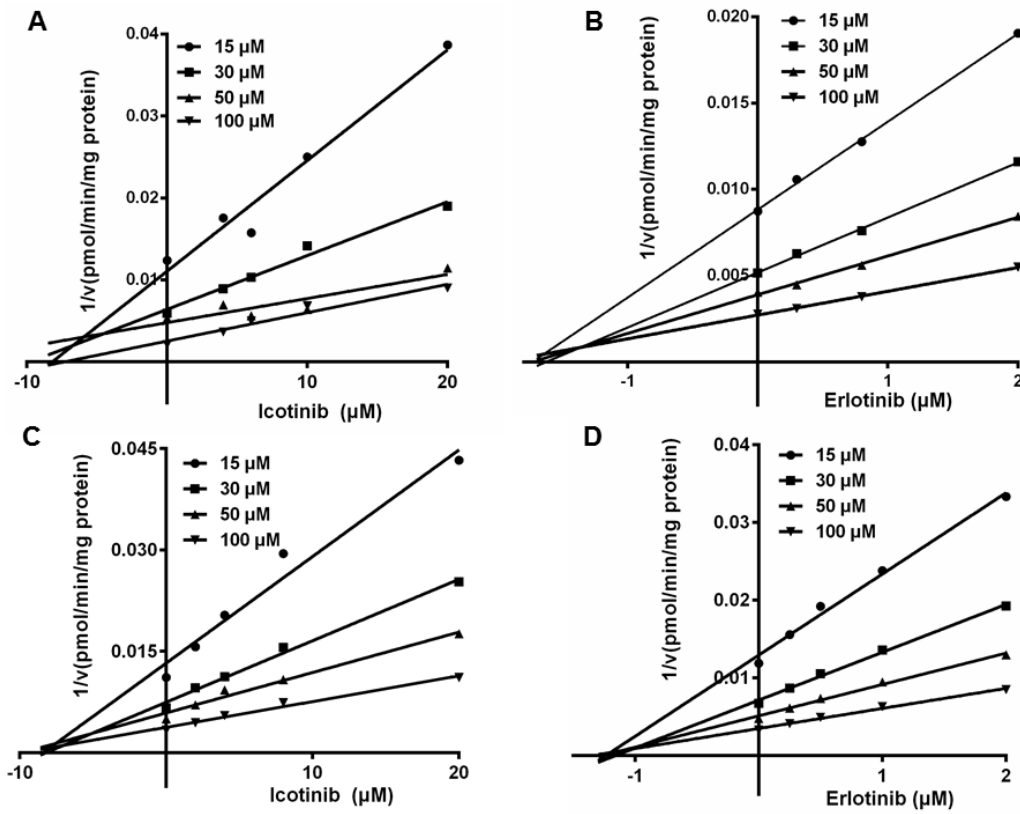

**Figure S2** The Dixon plots for inhibition of icotinib and erlotinib against UGT1A1-mediated NCHN-*O*-glucuronidation in recombinant UGT1A1 (A and B) and HLMs (C and D).
